# Supplementary material for: Mapping of Variable DNA Methylation Across Multiple Cell Types Defines a Dynamic Regulatory Landscape of the Human Genome
Source: PubMed Central journal article supplement (PMC4825665; doi:10.1534/g3.115.025437), 2016-02-16
Supplement: supp_g3.115.025437_FigureS2.pdf [file supp_g3.115.025437_FigureS2.pdf]

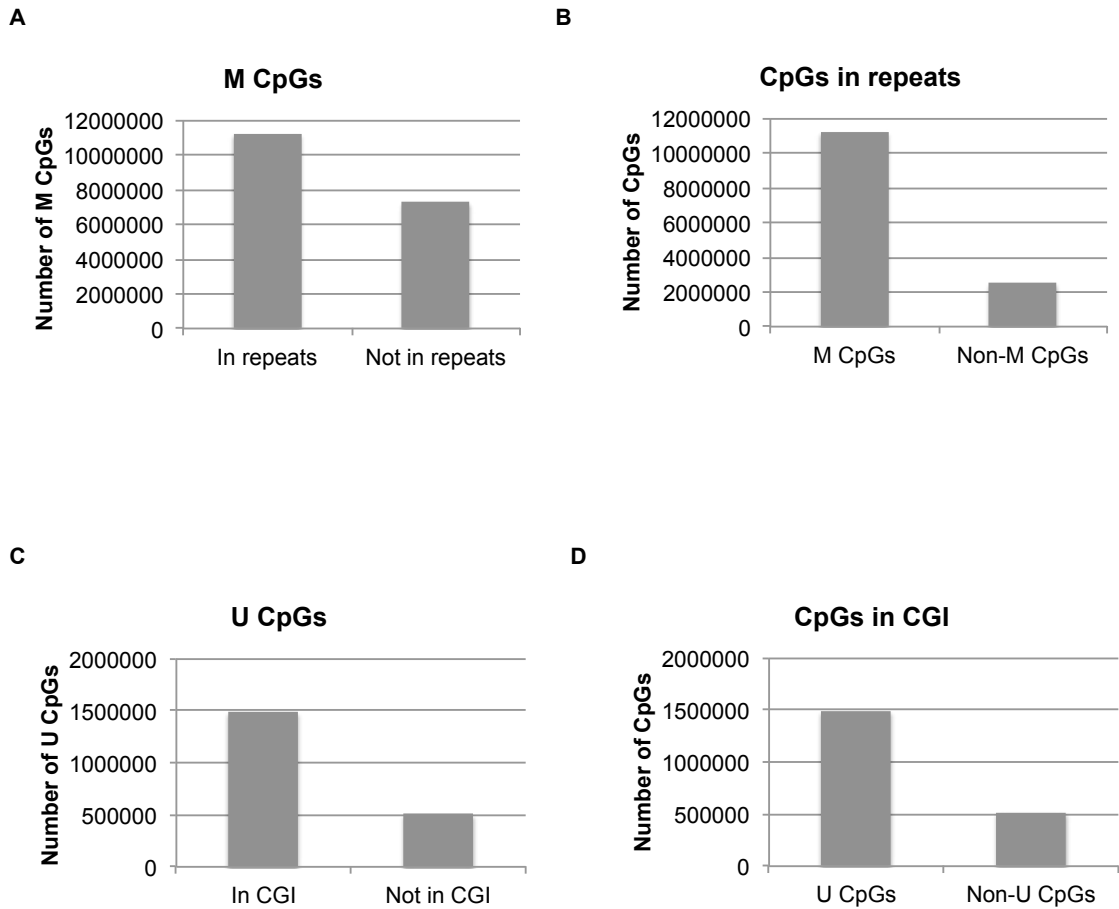

Figure S2. Overlap of constitutively methylated CpGs with repeats and constitutively unmethylated CpGs with CpG islands.

- A. Number of constitutively methylated CpGs (M CpGs) in repeats vs. not in repeats.
- B. Number of constitutively methylated CpGs (M CpGs) and non-constitutively methylated CpGs (Non-M CpGs) in repeats.
- C. Number of constitutively unmethylated CpGs (U CpGs) in CpG islands (CGI) vs. not in CpG islands.
- D. Number of constitutively unmethylated CpGs (U CpGs) and non-constitutively unmethylated CpGs (Non-U CpGs) in CpG islands.
