# Supplementary material for: Mapping of Variable DNA Methylation Across Multiple Cell Types Defines a Dynamic Regulatory Landscape of the Human Genome
Source: PubMed Central journal article supplement (PMC4825665; doi:10.1534/g3.115.025437), 2016-02-16
Supplement: supp_g3.115.025437_FigureS4.pdf [file supp_g3.115.025437_FigureS4.pdf]

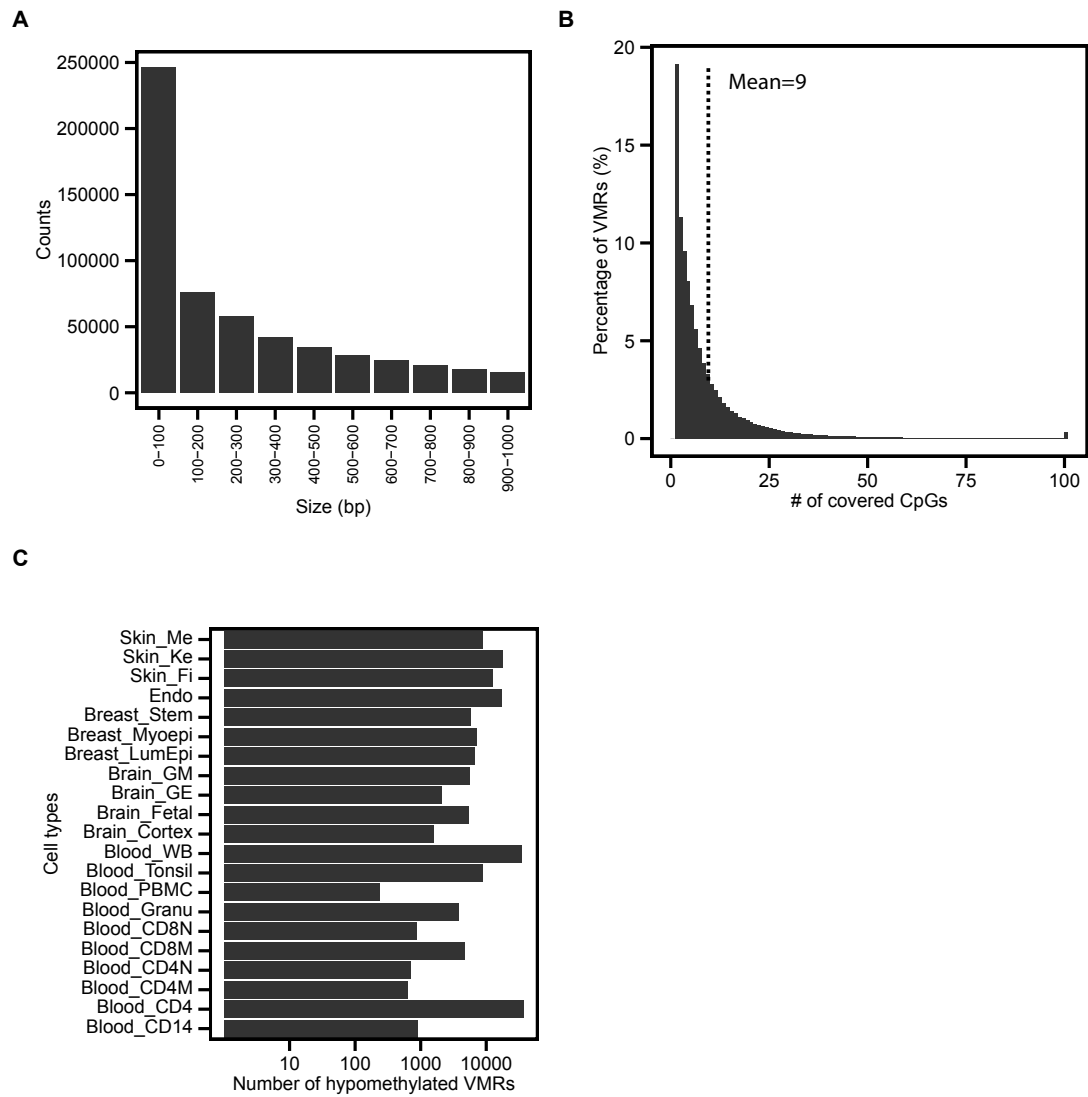

Figure S4. Characterization of variably methylated regions (VMRs) continued.

- A. Histogram of sizes of VMRs within 0-1000 bp range.
- B. Histogram of the number of CpGs covered in VMRs.
- C. Number of hypomethylated VMRs in each cell type.
