# Supplementary material for: Mapping of Variable DNA Methylation Across Multiple Cell Types Defines a Dynamic Regulatory Landscape of the Human Genome
Source: PubMed Central journal article supplement (PMC4825665; doi:10.1534/g3.115.025437), 2016-02-16
Supplement: supp_g3.115.025437_FigureS5.pdf [file supp_g3.115.025437_FigureS5.pdf]

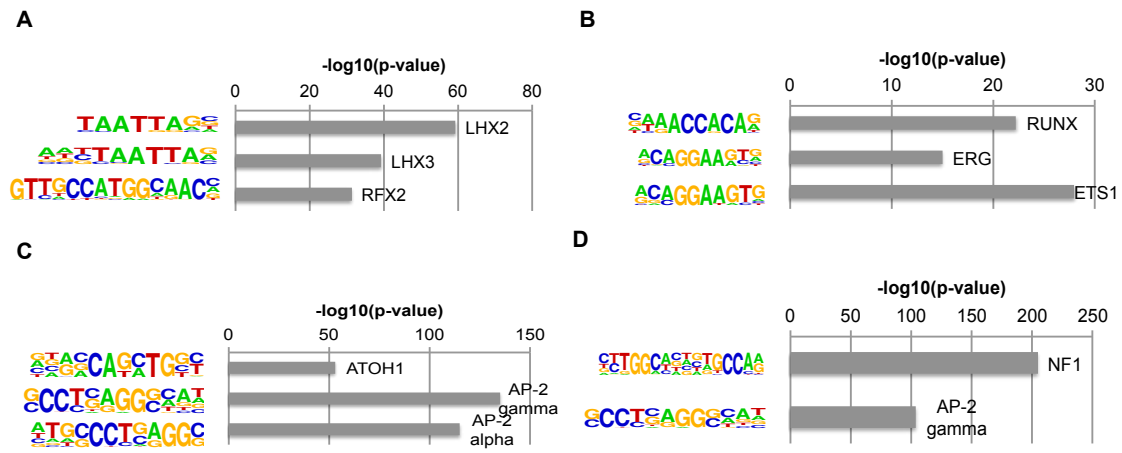

Figure S5. Known transcription factor binding motifs enriched in VMRs for each tissue type and their enrichment in (A) brain (B) blood (C) skin and (D) breast.
