# Supplementary material for: Mapping of Variable DNA Methylation Across Multiple Cell Types Defines a Dynamic Regulatory Landscape of the Human Genome
Source: PubMed Central journal article supplement (PMC4825665; doi:10.1534/g3.115.025437), 2016-02-16
Supplement: supp_g3.115.025437_FigureS6.pdf [file supp_g3.115.025437_FigureS6.pdf]

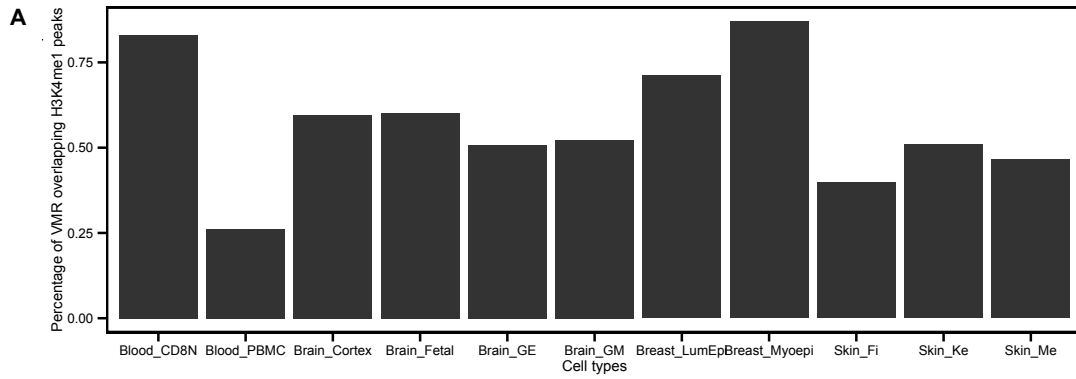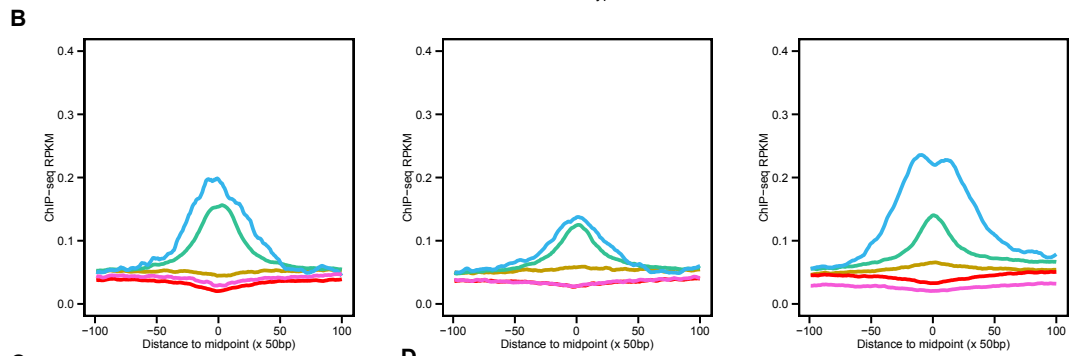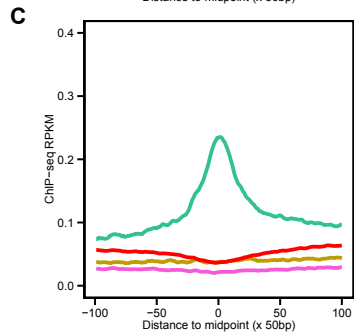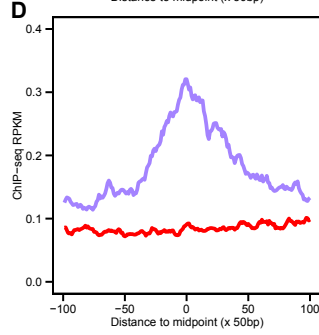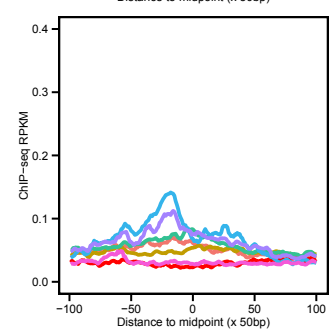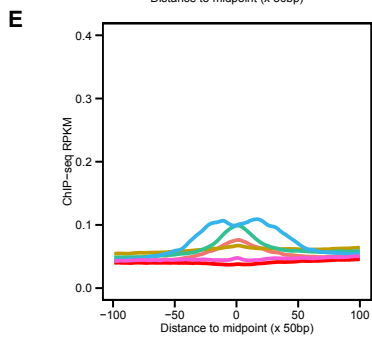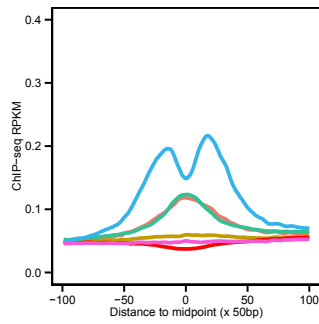

Histone — H3K27ac — H3K27me3 — H3K36me3 — H3K4me1 — H3K4me3 — H3K9ac — H3K9me3

Figure S6. Hypomethylated VMRs enrich for enhancer or active transcription histone modifications.

- a. Percentage of hypomethylated VMRs overlapping H3K4me1 peaks in different cell types.
- b. Mean ChIP-seq signal over 10kb regions centered on the middle point of VMRs in (B) Brain\_GE, Brain\_GM, Brain\_Fetal; (C) Breast\_LumEpi; (D) Blood\_CD4N, Blood\_PBMC; (E) Skin\_Fi, Skin\_Me.
