# Supplementary material for: Mapping of Variable DNA Methylation Across Multiple Cell Types Defines a Dynamic Regulatory Landscape of the Human Genome
Source: PubMed Central journal article supplement (PMC4825665; doi:10.1534/g3.115.025437), 2016-02-16
Supplement: supp_g3.115.025437_FigureS7.pdf [file supp_g3.115.025437_FigureS7.pdf]

**Local DAG for enriched terms in GO Biological Process**  
 Nodes sized according to Binomial Fold Enrichment

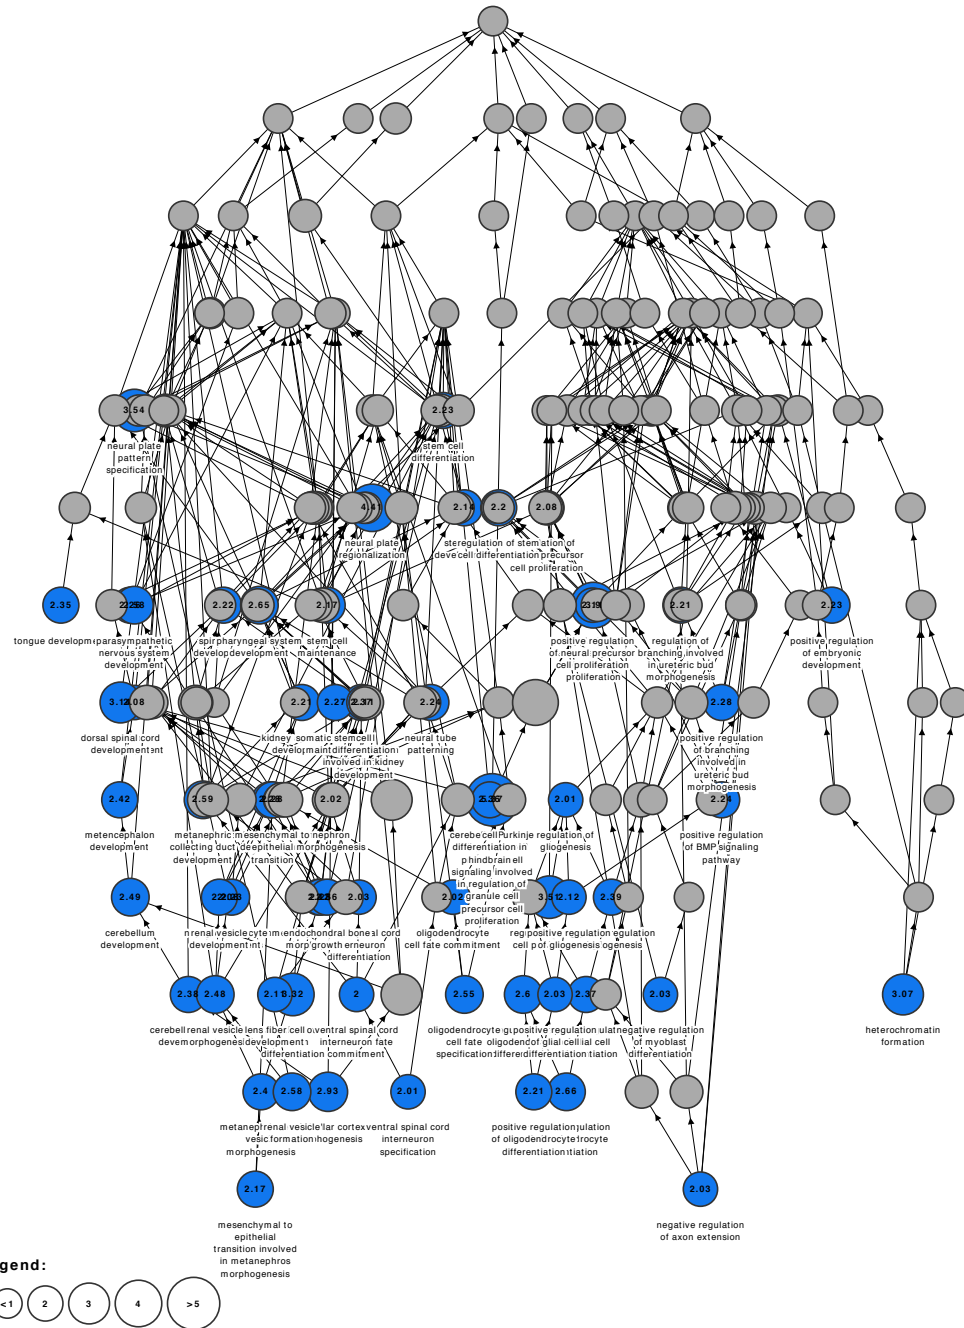

Figure S7. Hierarchy of functional enrichment of genes near hypomethylated VMRs in fetal brain.
