# Supplementary material for: Mapping of Variable DNA Methylation Across Multiple Cell Types Defines a Dynamic Regulatory Landscape of the Human Genome
Source: PubMed Central journal article supplement (PMC4825665; doi:10.1534/g3.115.025437), 2016-02-16
Supplement: supp_g3.115.025437_FigureS8.pdf [file supp_g3.115.025437_FigureS8.pdf]

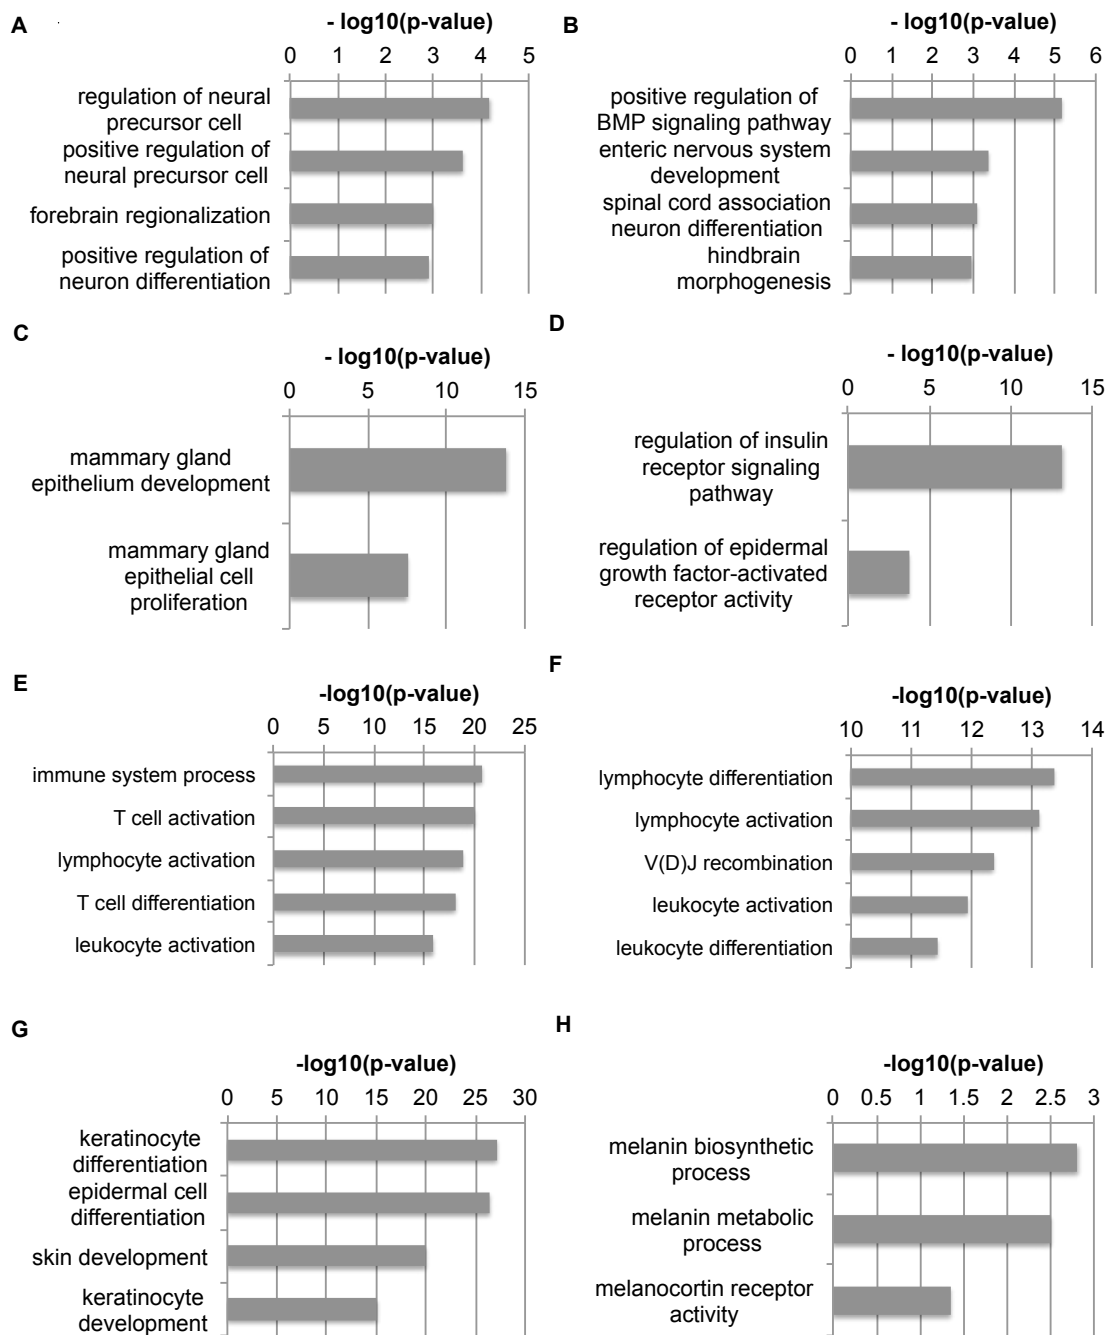

Figure S8. Functional enrichment of genes near hypomethylated VMRs.

Functional enrichment of genes near hypomethylated VMRs in (A) Brain\_Cortex (B) Brain\_GM (C) Breast\_LumEpi (D) Breast\_Myoepi (E) Blood\_CD8N (F) Blood\_CD4N (G) Skin\_Ke and (H) Skin\_Me.
