# Supplementary material for: Mapping of Variable DNA Methylation Across Multiple Cell Types Defines a Dynamic Regulatory Landscape of the Human Genome
Source: PubMed Central journal article supplement (PMC4825665; doi:10.1534/g3.115.025437), 2016-02-16
Supplement: supp_g3.115.025437_FigureS12.pdf [file supp_g3.115.025437_FigureS12.pdf]

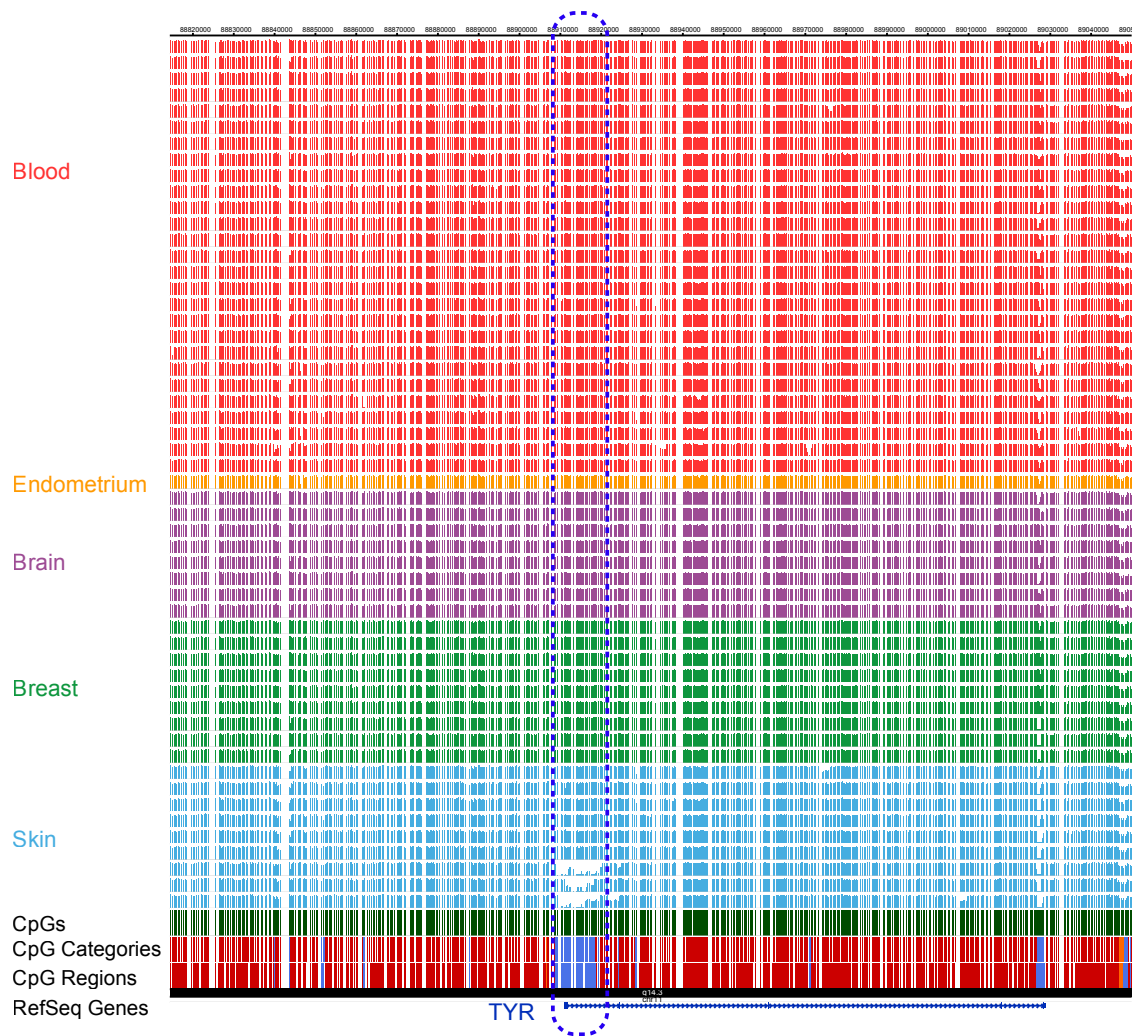

Figure S12. *TYR* is potentially regulated by VMRs in melanocyte.
