# Supplementary material for: Mapping of Variable DNA Methylation Across Multiple Cell Types Defines a Dynamic Regulatory Landscape of the Human Genome
Source: PubMed Central journal article supplement (PMC4825665; doi:10.1534/g3.115.025437), 2016-02-16
Supplement: supp_g3.115.025437_FigureS13.pdf [file supp_g3.115.025437_FigureS13.pdf]

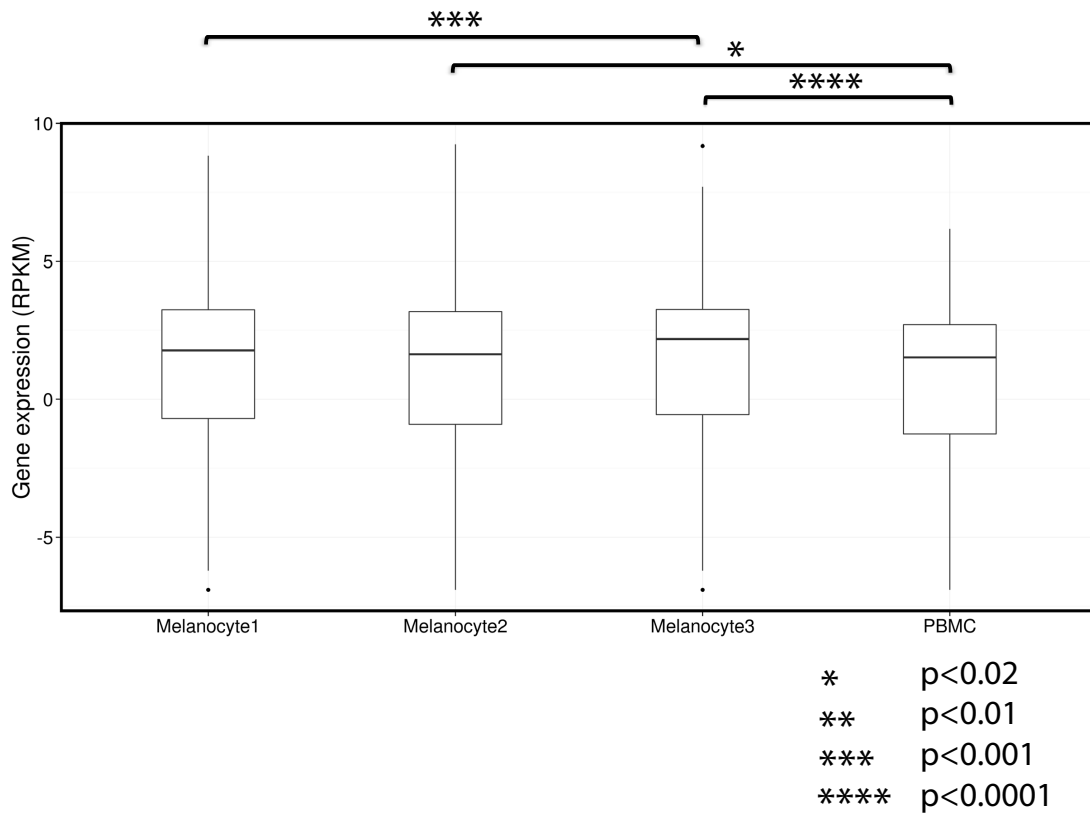

Figure S13. Genes near hypomethylated VMRs show increased expression. RNA-seq derived expression values of genes within 10kb regions of melanocyte hypomethylated VMRs were calculated for melanocyte and PBMC and Kruskal-Wallis test was used to compare expression levels between samples.
