# Supplementary material for: Mapping of Variable DNA Methylation Across Multiple Cell Types Defines a Dynamic Regulatory Landscape of the Human Genome
Source: PubMed Central journal article supplement (PMC4825665; doi:10.1534/g3.115.025437), 2016-02-16
Supplement: supp_g3.115.025437_FigureS14.pdf [file supp_g3.115.025437_FigureS14.pdf]

**A**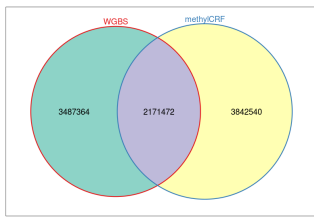**B**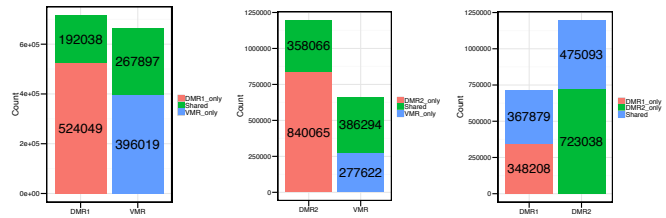**C**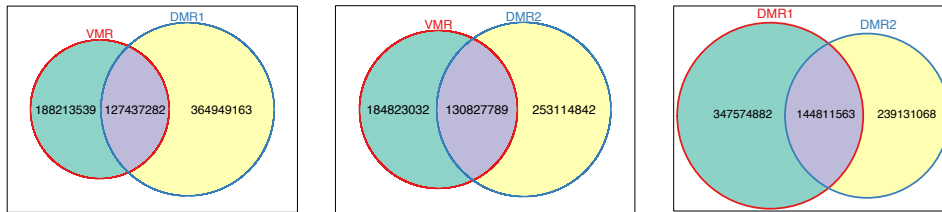**D**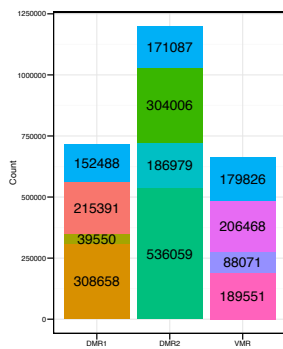**E**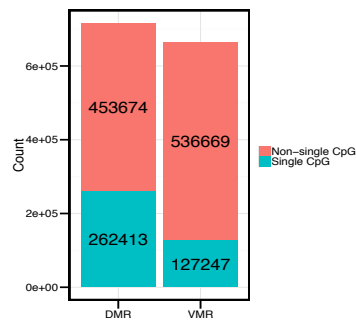**F**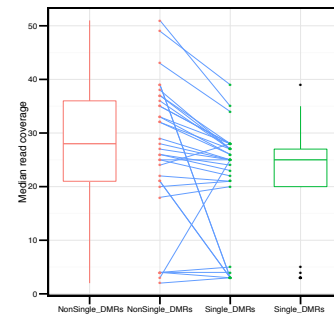**G**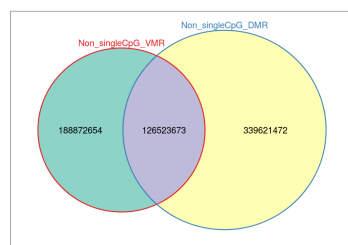**H**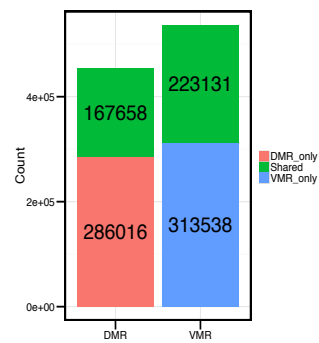

Figure S14. Comparison between methylCRF predicted VMRs and WGBS predicted DMRs.

- A. Overlap between dynamic CpGs identified from WGBS data and variably methylated CpGs identified from methylCRF.
- B. Overlap between regions of VMRs and DMRs. VMR refers to the regions defined in this study. DMR1 refers to the regions defined by Ziller et al. and DMR2 by Schultz et al.
- C. Overlap between bases covered by VMRs and those by DMRs.
- D. Number of regions in each study that overlap with regions defined in none, one or two of the other studies. DMR1\_DMR2 indicates overlap between the two studies. DMR1\_only indicates regions that are only found in Ziller et al. Shared indicates regions overlap with both other studies.
- E. Number of DMRs and VMRs with single CpG and more than one CpG. Only DMRs defined in Ziller et al. was used for analysis in panel E, F, G and H.
- F. Median read coverage for each WGBS library on CpGs in single CpG DMRs (Single\_DMRs) or non-single CpG DMRs (NonSingle\_DMRs).
- G. Overlap between bases covered by non-single CpG VMRs and non-single CpG DMRs.
- H. Overlap between regions of non-single CpG VMRs and non-single CpG DMRs.
