# Supplementary material for: Mapping of Variable DNA Methylation Across Multiple Cell Types Defines a Dynamic Regulatory Landscape of the Human Genome
Source: PubMed Central journal article supplement (PMC4825665; doi:10.1534/g3.115.025437), 2016-02-16
Supplement: supp_g3.115.025437_FigureS16.pdf [file supp_g3.115.025437_FigureS16.pdf]

**FigS16**

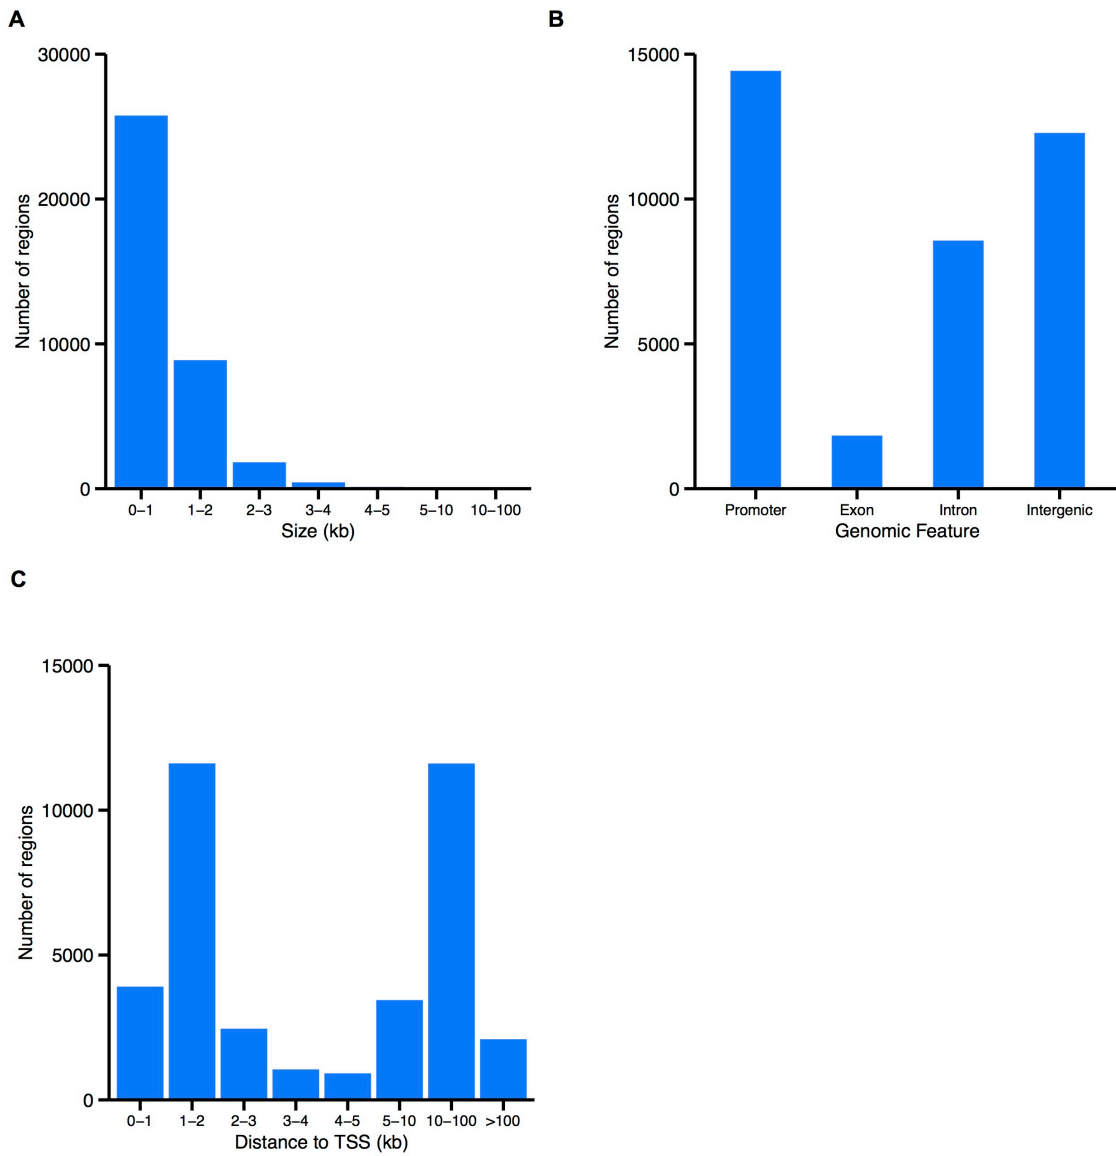

Figure S16. Characterization of constitutively unmethylated regions (UMRs).

A. Distribution of UMR lengths at each range. B. Percentage of UMRs at each length range. C. Distance of UMRs to the nearest transcription start sites (TSSs).
