# Supplementary material for: Mapping of Variable DNA Methylation Across Multiple Cell Types Defines a Dynamic Regulatory Landscape of the Human Genome
Source: PubMed Central journal article supplement (PMC4825665; doi:10.1534/g3.115.025437), 2016-02-16
Supplement: supp_g3.115.025437_FigureS17.pdf [file supp_g3.115.025437_FigureS17.pdf]

FigS17

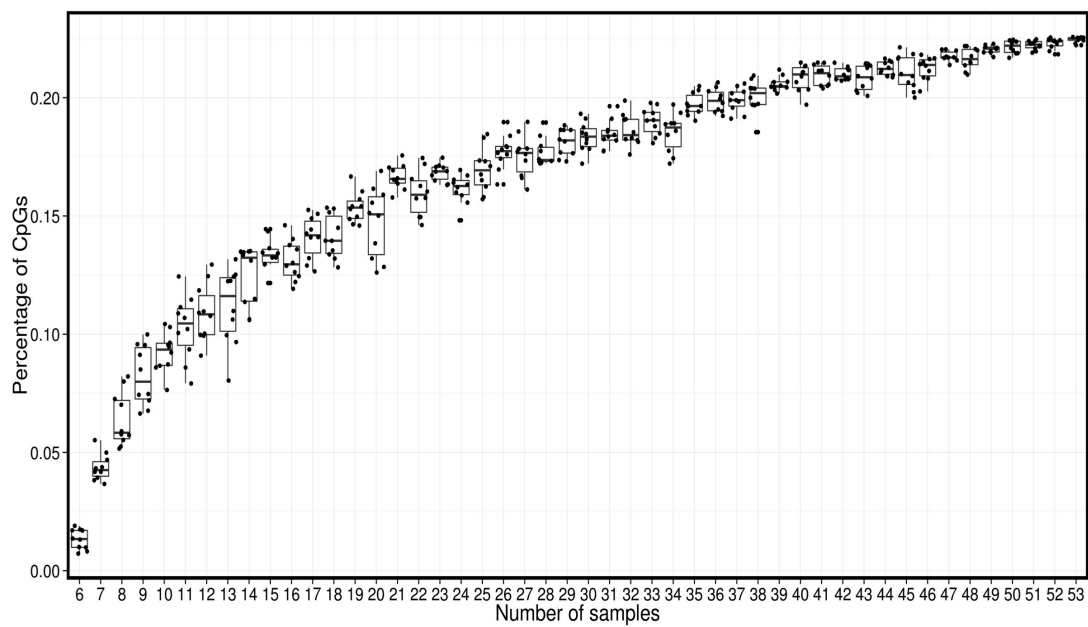

Figure S17. Saturation analysis on the identification of variably methylated CpGs. CpGs on chr10 were used in this analysis.
